# Supplementary material for: Productive pedagogies: Working with disciplines and teacher and student voices
Source: Royal Society of Chemistry journal article supplement (doi:10.1039/d4cp00160e), 2008-01-01
Supplement: d4cp00160e1.pdf [file d4cp00160e1.pdf]

A Support material

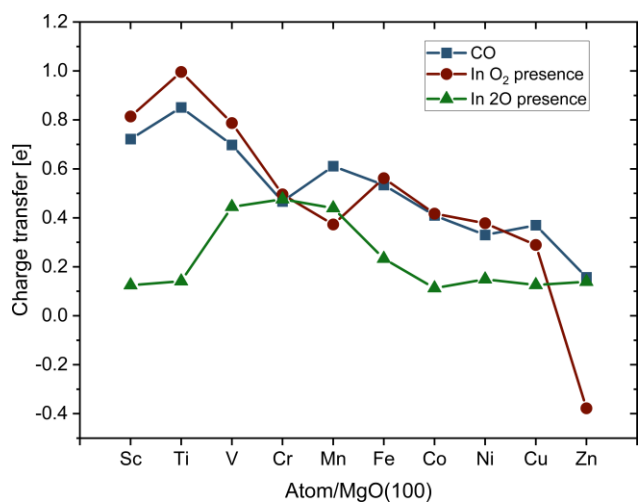

Fig. S1 Charge transfer towards CO from (blue) M/MgO(100), (red) in O<sub>2</sub> presence, and (green) on M/MgO(100) in 2O presence.

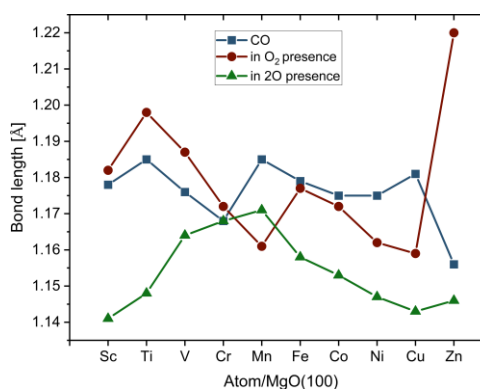

Fig. S2 CO bond length (blue) on M/MgO(100), (red) on M/MgO(100) in O<sub>2</sub> presence and (green) on M/MgO(100) in 2O presence

Table S1 Adsorption energy for atoms onto the surface using a four-layer slab  $E_{ads}^{4-layers}$ , and energies using our three-layer slab  $E_{ads}^{3-layers}$ .

| Atom | $E_{ads}^{3-layers}$ [eV] | $E_{ads}^{4-layers}$ [eV] |
|------|---------------------------|---------------------------|
| Sc   | -2.15                     | -2.15                     |
| Ti   | -1.88                     | -1.95                     |
| V    | -1.42                     | -1.42                     |
| Cr   | -0.64                     | -0.64                     |
| Mn   | -1.14                     | -1.14                     |
| Fe   | -1.95                     | -1.95                     |
| Co   | -1.91                     | -1.90                     |
| Ni   | -2.22                     | -2.22                     |
| Cu   | -1.26                     | -1.26                     |
| Zn   | -0.21                     | -0.21                     |

Table S2 Adsorption energy  $E_{ads}$ , charge transfer  $dQ$  and bond length B. L. Bold text indicate the system to which quantities correspond.

| <b>Metal</b>                 | <b>Sc</b> | <b>Ti</b> | <b>V</b> | <b>Cr</b> | <b>Mn</b> | <b>Fe</b> | <b>Co</b> | <b>Ni</b> | <b>Cu</b> | <b>Zn</b> |
|------------------------------|-----------|-----------|----------|-----------|-----------|-----------|-----------|-----------|-----------|-----------|
| $E_{ads-bridge}$ [eV]        | -1.67     | -1.55     | -1.03    | -0.38     | -0.67     | -1.95     | -1.77     | -1.40     | -1.26     | -0.17     |
| $E_{ads-top}$ [eV]           | -2.15     | -1.88     | -1.42    | -0.64     | -1.14     | -1.95     | -1.92     | -2.22     | -1.26     | -0.22     |
| $dQ_{pp}$ [e]                | -0.29     | -0.16     | -0.11    | -0.04     | -0.03     | 0.10      | 0.158     | 0.183     | 0.169     | 0.066     |
| $E_{dif-top}^{bulk}$ [ev]    | 0.48      | 0.33      | 0.46     | 0.27      | 0.48      | 0.67      | 0.52      | 0.81      | 0.52      | 0.05      |
| $E^{bulk}$ [ev]              | 2.47      | 4.16      | 4.60     | 3.80      | 3.45      | 3.85      | 4.25      | 3.30      | 2.76      | 1.49      |
| <b>O<sub>2</sub></b>         |           |           |          |           |           |           |           |           |           |           |
| $E_{ads}$ [eV]               | -4.69     | -5.23     | -4.58    | -3.82     | -3.09     | -3.20     | -3.47     | -2.76     | -2.12     | 0.04      |
| $dQ$ [e]                     | 11.50     | 1.30      | 1.17     | 1.16      | 1.13      | 0.98      | 0.83      | 0.69      | 0.67      | 0.81      |
| B. L. [Å]                    | 1.47      | 1.44      | 1.43     | 1.44      | 1.47      | 1.44      | 1.41      | 1.36      | 1.34      | 1.35      |
| <b>2O</b>                    |           |           |          |           |           |           |           |           |           |           |
| $E_{ads}$ [eV]               | -6.93     | -9.82     | -9.22    | -7.50     | -6.12     | -5.91     | -5.32     | -3.81     | -1.93     | -1.24     |
| $dQ$ [e]                     | 2.63      | 2.73      | 2.44     | 2.12      | 2.14      | 1.87      | 1.66      | 1.82      | 1.88      | 1.94      |
| <b>Only CO</b>               |           |           |          |           |           |           |           |           |           |           |
| $E_{ads}$ [eV]               | -0.94     | -2.00     | -2.40    | -1.84     | -1.74     | -2.45     | -3.51     | -3.60     | -1.43     | 0.06      |
| $dQ$ [e]                     | 0.722     | 0.85      | 0.70     | 0.47      | 0.61      | 0.53      | 0.41      | 0.33      | 0.37      | 0.16      |
| B. L. [Å]                    | 1.18      | 1.18      | 1.18     | 1.17      | 1.18      | 1.18      | 1.18      | 1.18      | 1.18      | 1.16      |
| <b>CO with O<sub>2</sub></b> |           |           |          |           |           |           |           |           |           |           |
| $E_{ads}$ [eV]               | -1.12     | -1.37     | -1.83    | -0.84     | -0.84     | -1.20     | -1.30     | -0.55     | -0.54     | -2.62     |
| $dQ$ [e]                     | 0.81      | 1.00      | 0.79     | 0.50      | 0.37      | 0.56      | 0.42      | 0.38      | 0.29      | -0.38     |
| B. L. [Å]                    | 1.18      | 1.20      | 1.19     | 1.17      | 1.16      | 1.18      | 1.17      | 1.16      | 1.16      | 1.22      |
| <b>CO with 2O</b>            |           |           |          |           |           |           |           |           |           |           |
| $E_{ads}$ [eV]               | -0.71     | -0.35     | -1.56    | -1.62     | -1.45     | -0.88     | -1.01     | -0.32     | -0.32     | -0.34     |
| $dQ$ [e]                     | 0.12      | 0.14      | 0.44     | 0.48      | 0.44      | 0.23      | 0.11      | 0.15      | 0.13      | 0.14      |
| B. L. [Å]                    | 1.14      | 1.15      | 1.16     | 1.17      | 1.17      | 1.16      | 1.15      | 1.15      | 1.14      | 1.15      |
| <b>CO with O</b>             |           |           |          |           |           |           |           |           |           |           |
| $E_{ads}$ [eV]               | -0.97     | -1.55     | -2.84    | -1.98     | -2.04     | -2.40     | -1.98     | -1.43     | -1.47     | -0.53     |
| $dQ$ [e]                     | 0.76      | 0.83      | 0.69     | 0.59      | 0.64      | 0.43      | 0.33      | 0.31      | 0.22      | 0.13      |
| B. L. [Å]                    | 1.18      | 1.18      | 1.18     | 1.18      | 1.18      | 1.17      | 1.17      | 1.16      | 1.16      | 1.15      |
| <b>CO<sub>2</sub></b>        |           |           |          |           |           |           |           |           |           |           |
| $E_{ads}$ [eV]               | -1.86     | -1.89     | -1.48    | -0.56     | -0.25     | -0.46     | -2.24     | -1.95     | -0.64     | 0.14      |
| $dQ$ [e]                     | 1.52      | 1.34      | 1.22     | 0.88      | 0.67      | 0.66      | 0.61      | 0.53      | 0.52      | 0.54      |
| <b>Formation 1</b>           |           |           |          |           |           |           |           |           |           |           |
| $E_{on-top}$ [eV]            | -0.54     | -2.24     | -3.14    | -2.48     | -1.20     | -1.10     | 0.31      | 1.32      | 2.80      | 2.17      |
| $E_{bridge}$ [eV]            | 1.01      | -1.33     | -3.51    | -2.46     | -1.48     | -0.96     | 0.08      | 1.68      | 2.52      | 2.98      |
| <b>Formation 2</b>           |           |           |          |           |           |           |           |           |           |           |
| $E_{on-top}$ [eV]            | -1.76     | -2.94     | -2.82    | -1.08     | -0.06     | -0.55     | -0.93     | 0.09      | 1.53      | 1.24      |
| $E_{bridge}$ [eV]            | -2.68     | -3.45     | -3.16    | -1.69     | -1.18     | -1.29     | -1.45     | -0.30     | 0.69      | 1.86      |
|                              | <b>Sc</b> | <b>Ti</b> | <b>V</b> | <b>Cr</b> | <b>Mn</b> | <b>Fe</b> | <b>Co</b> | <b>Ni</b> | <b>Cu</b> | <b>Zn</b> |
